# Supplementary material for: When do persuasive messages on vaccine safety steer COVID-19 vaccine acceptance and recommendations? Behavioral insights from a randomised controlled experiment in Malaysia
Source: bioRxiv or medRxiv preprint supplement (doi:10.1101/2022.04.17.22273942), 2022-04-18
Supplement: Supplementary file [file media-3.pdf]

**Table S1: Baseline characteristics of survey participants stratified according to experimental arms**

|                                        |                    | DN (70%)        | DN              | HCW             | NF              | PF              | RC(S)           | RC(SE)          | Control         | DN(70%) + DN    | DN(70%) + HCW   | DN(70%) + NF    | DN(70%) + PF    | DN(70%) + RC(S) | DN(70%) + RC(SE) | T-test/Chi square |
|----------------------------------------|--------------------|-----------------|-----------------|-----------------|-----------------|-----------------|-----------------|-----------------|-----------------|-----------------|-----------------|-----------------|-----------------|-----------------|------------------|-------------------|
|                                        |                    | Mean±SD or N(%) | Mean±SD or N(%) | Mean±SD or N(%) | Mean±SD or N(%) | Mean±SD or N(%) | Mean±SD or N(%) | Mean±SD or N(%) | Mean±SD or N(%) | Mean±SD or N(%) | Mean±SD or N(%) | Mean±SD or N(%) | Mean±SD or N(%) | Mean±SD or N(%) | Mean±SD or N(%)  | P-value           |
| Age                                    |                    | 37±11.6         | 36±11.9         | 36±11.8         | 36±11.5         | 36±11.9         | 35±11.3         | 36±11.7         | 36±11.6         | 36±11.7         | 36±11.9         | 36±11.8         | 36±11.4         | 36±11.9         | 36±11.6          | 0.999             |
| Sex                                    | Male               | 210 (50.6)      | 203 (49.4)      | 206 (50.2)      | 206 (49.8)      | 208 (50.2)      | 210 (50.5)      | 205 (50.0)      | 207 (50.5)      | 211 (50.8)      | 207 (49.8)      | 207 (50.1)      | 211 (50.8)      | 211 (50.8)      | 205 (50.0)       | 1                 |
| Education level                        | Tertiary education | 194(46.7)       | 218(53.0)       | 205(50.0)       | 209(50.5)       | 182(44.0)       | 198(47.6)       | 200(48.8)       | 217(52.9)       | 194(46.7)       | 225(54.1)       | 209(50.6)       | 204(49.2)       | 215(51.8)       | 195(47.6)        | 0.169             |
| Intent to vaccinate                    | Definitely not     | 5(1.2)          | 8(1.9)          | 8(2.0)          | 9(2.2)          | 9(2.2)          | 7(1.7)          | 8(2.0)          | 5(1.2)          | 7(1.7)          | 9(2.2)          | 7(1.7)          | 9(2.2)          | 11(2.7)         | 4(1.0)           | 0.968             |
|                                        | Probably not       | 32(7.7)         | 28(6.8)         | 25(6.1)         | 28(6.8)         | 26(6.3)         | 29(7.0)         | 30(7.3)         | 32(7.8)         | 34(8.2)         | 33(7.9)         | 20(4.8)         | 29(7.0)         | 27(6.5)         | 17(4.1)          |                   |
|                                        | Probably yes       | 123(29.6)       | 118(28.7)       | 119(29.0)       | 120(29.0)       | 133(32.1)       | 133(32.0)       | 121(29.5)       | 111(27.1)       | 129(31.1)       | 122(29.3)       | 116(28.1)       | 132(31.8)       | 123(29.6)       | 124(30.2)        |                   |
|                                        | Definitely yes     | 255(61.4)       | 257(62.5)       | 258(62.9)       | 257(62.1)       | 246(59.4)       | 247(59.4)       | 251(61.2)       | 262(63.9)       | 245(59.0)       | 252(60.6)       | 270(65.4)       | 245(59.0)       | 254(61.2)       | 265(64.6)        |                   |
| Intent to recommend:<br>Healthy adults | Strongly disagree  | 8(1.9)          | 8(1.9)          | 5(1.2)          | 7(1.7)          | 6(1.4)          | 7(1.7)          | 7(1.7)          | 6(1.5)          | 7(1.7)          | 5(1.2)          | 8(1.9)          | 5(1.2)          | 5(1.2)          | 3(0.7)           | 0.92              |
|                                        | Disagree           | 15(3.6)         | 11(2.7)         | 11(2.7)         | 9(2.2)          | 13(3.1)         | 10(2.4)         | 18(4.4)         | 8(2.0)          | 12(2.9)         | 22(5.3)         | 13(3.1)         | 17(4.1)         | 17(4.1)         | 9(2.2)           |                   |
|                                        | Not sure           | 46(11.1)        | 42(10.2)        | 43(10.5)        | 53(12.8)        | 49(11.8)        | 37(8.9)         | 43(10.5)        | 36(8.8)         | 48(11.6)        | 40(9.6)         | 37(9.0)         | 49(11.8)        | 42(10.1)        | 40(9.8)          |                   |
|                                        | Agree              | 198(47.7)       | 202(49.1)       | 183(44.6)       | 198(47.8)       | 204(49.3)       | 210(50.5)       | 195(47.6)       | 206(50.2)       | 204(49.2)       | 214(51.4)       | 213(51.6)       | 201(48.4)       | 196(47.2)       | 209(51.0)        |                   |
|                                        | Strongly agree     | 148(35.7)       | 148(36.0)       | 168(41.0)       | 147(35.5)       | 142(34.3)       | 152(36.5)       | 147(35.9)       | 154(37.6)       | 144(34.7)       | 135(32.5)       | 142(34.4)       | 143(34.5)       | 155(37.3)       | 149(36.3)        |                   |
| Elderly                                | Strongly disagree  | 11(2.7)         | 10(2.4)         | 12(2.9)         | 11(2.7)         | 9(2.2)          | 11(2.6)         | 13(3.2)         | 13(3.2)         | 11(2.7)         | 18(4.3)         | 8(1.9)          | 13(3.1)         | 19(4.6)         | 9(2.2)           | 0.622             |
|                                        | Disagree           | 36(8.7)         | 28(6.8)         | 23(5.6)         | 27(6.5)         | 28(6.8)         | 28(6.7)         | 30(7.3)         | 25(6.1)         | 26(6.3)         | 35(8.4)         | 16(3.9)         | 24(5.8)         | 20(4.8)         | 26(6.3)          |                   |
|                                        | Not sure           | 68(16.4)        | 75(18.2)        | 69(16.8)        | 78(18.8)        | 79(19.1)        | 76(18.3)        | 73(17.8)        | 64(15.6)        | 96(23.1)        | 80(19.2)        | 72(17.4)        | 79(19.0)        | 61(14.7)        | 70(17.1)         |                   |
|                                        | Agree              | 161(38.8)       | 164(39.9)       | 153(37.3)       | 156(37.7)       | 165(39.9)       | 169(40.6)       | 156(38.0)       | 182(44.4)       | 159(38.3)       | 156(37.5)       | 173(41.9)       | 165(39.8)       | 177(42.7)       | 167(40.7)        |                   |
|                                        | Strongly agree     | 139(33.5)       | 134(32.6)       | 153(37.3)       | 142(34.3)       | 133(32.1)       | 132(31.7)       | 138(33.7)       | 126(30.7)       | 123(29.6)       | 127(30.5)       | 144(34.9)       | 134(32.3)       | 138(33.3)       | 138(33.7)        |                   |
| People with health conditions          | Strongly disagree  | 15(3.6)         | 19(4.6)         | 20(4.9)         | 22(5.3)         | 18(4.3)         | 26(6.3)         | 24(5.9)         | 21(5.1)         | 18(4.3)         | 24(5.8)         | 19(4.6)         | 24(5.8)         | 26(6.3)         | 16(3.9)          | 0.941             |
|                                        | Disagree           | 63(15.2)        | 59(14.4)        | 40(9.8)         | 58(14.0)        | 55(13.3)        | 56(13.5)        | 60(14.6)        | 49(12.0)        | 58(14.0)        | 60(14.4)        | 49(11.9)        | 62(14.9)        | 46(11.1)        | 51(12.4)         |                   |
|                                        | Not sure           | 128(30.8)       | 113(27.5)       | 121(29.5)       | 126(30.4)       | 133(32.1)       | 128(30.8)       | 119(29.0)       | 120(29.3)       | 131(31.6)       | 121(29.1)       | 120(29.1)       | 137(33.0)       | 124(29.9)       | 131(32.0)        |                   |
|                                        | Agree              | 114(27.5)       | 120(29.2)       | 136(33.2)       | 110(26.6)       | 113(27.3)       | 103(24.8)       | 115(28.0)       | 128(31.2)       | 125(30.1)       | 123(29.6)       | 124(30.0)       | 110(26.5)       | 126(30.4)       | 124(30.2)        |                   |
|                                        | Strongly agree     | 95(22.9)        | 100(24.3)       | 93(22.7)        | 98(23.7)        | 95(22.9)        | 103(24.8)       | 92(22.4)        | 92(22.4)        | 83(20.0)        | 88(21.2)        | 101(24.5)       | 82(19.8)        | 93(22.4)        | 88(21.5)         |                   |
| Negative vaccine attitude              | No                 | 272(65.5)       | 275(66.9)       | 266(64.9)       | 278(67.1)       | 267(64.5)       | 256(61.5)       | 261(63.7)       | 267(65.1)       | 273(65.8)       | 261(62.7)       | 281(68.0)       | 253(61.0)       | 266(64.1)       | 277(67.6)        | 0.603             |
