# Supplementary material for: When do persuasive messages on vaccine safety steer COVID-19 vaccine acceptance and recommendations? Behavioral insights from a randomised controlled experiment in Malaysia
Source: bioRxiv or medRxiv preprint supplement (doi:10.1101/2022.04.17.22273942), 2022-04-18
Supplement: Supplementary file [file media-4.pdf]

**Table S2: Average marginal effects for intention to accept the COVID-19 vaccine in each experimental arm relative to control arm**

|                | <b>Intention to vaccinate</b><br>Marginal effects<br>[95% Confidence Interval] |
|----------------|--------------------------------------------------------------------------------|
| <b>DN(70%)</b> |                                                                                |
| Definitely no  | 0.00392<br>[-0.000780,0.00861]                                                 |
| Probably no    | 0.00516<br>[-0.00106,0.0114]                                                   |
| Probably yes   | 0.0163<br>[-0.00324,0.0359]                                                    |
| Definitely yes | -0.0254<br>[-0.0557,0.00484]                                                   |
| <b>DN</b>      |                                                                                |
| Definitely no  | -0.000924<br>[-0.00519,0.00334]                                                |
| Probably no    | -0.00133<br>[-0.00745,0.00480]                                                 |
| Probably yes   | -0.00446<br>[-0.0250,0.0161]                                                   |
| Definitely yes | 0.00671<br>[-0.0242,0.0376]                                                    |
| <b>HCW</b>     |                                                                                |
| Definitely no  | 0.000472<br>[-0.00394,0.00488]                                                 |
| Probably no    | 0.000659<br>[-0.00550,0.00682]                                                 |
| Probably yes   | 0.00217<br>[-0.0182,0.0225]                                                    |
| Definitely yes | -0.00330<br>[-0.0342,0.0276]                                                   |
| <b>NF</b>      |                                                                                |
| Definitely no  | 0.00519*<br>[0.000312,0.0101]                                                  |
| Probably no    | 0.00671*<br>[0.000347,0.0131]                                                  |
| Probably yes   | 0.0210*<br>[0.00134,0.0406]                                                    |
| Definitely yes | -0.0329*<br>[-0.0633,-0.00240]                                                 |
| <b>PF</b>      |                                                                                |
| Definitely no  | -0.000954<br>[-0.00517,0.00326]                                                |
| Probably no    | -0.00137<br>[-0.00742,0.00468]                                                 |

|                    |                                |
|--------------------|--------------------------------|
| Probably yes       | -0.00461<br>[-0.0249,0.0157]   |
| Definitely yes     | 0.00693<br>[-0.0236,0.0375]    |
| <hr/>              |                                |
| <b>RC(S)</b>       |                                |
| Definitely no      | 0.000399<br>[-0.00393,0.00473] |
| Probably no        | 0.000558<br>[-0.00550,0.00661] |
| Probably yes       | 0.00184<br>[-0.0182,0.0219]    |
| Definitely yes     | -0.00280<br>[-0.0332,0.0276]   |
| <hr/>              |                                |
| <b>RC(SE)</b>      |                                |
| Definitely no      | 0.00139<br>[-0.00307,0.00585]  |
| Probably no        | 0.00191<br>[-0.00422,0.00804]  |
| Probably yes       | 0.00623<br>[-0.0138,0.0262]    |
| Definitely yes     | -0.00954<br>[-0.0401,0.0210]   |
| <hr/>              |                                |
| <b>DN(70%)+DN</b>  |                                |
| Definitely no      | 0.00161<br>[-0.00281,0.00603]  |
| Probably no        | 0.00220<br>[-0.00385,0.00825]  |
| Probably yes       | 0.00716<br>[-0.0126,0.0269]    |
| Definitely yes     | -0.0110<br>[-0.0411,0.0192]    |
| <hr/>              |                                |
| <b>DN(70%)+HCW</b> |                                |
| Definitely no      | 0.00158<br>[-0.00288,0.00603]  |
| Probably no        | 0.00216<br>[-0.00395,0.00826]  |
| Probably yes       | 0.00703<br>[-0.0128,0.0269]    |
| Definitely yes     | -0.0108<br>[-0.0412,0.0196]    |
| <hr/>              |                                |
| <b>DN(70%)+NF</b>  |                                |
| Definitely no      | 0.00565*<br>[0.000671,0.0106]  |
| Probably no        | 0.00726*<br>[0.000827,0.0137]  |

|                       |                                |
|-----------------------|--------------------------------|
| Probably yes          | 0.0226*<br>[0.00288,0.0423]    |
| Definitely yes        | -0.0355*<br>[-0.0661,-0.00485] |
| <hr/>                 |                                |
| <b>DN(70%)+PF</b>     |                                |
| Definitely no         | 0.00241<br>[-0.00211,0.00693]  |
| Probably no           | 0.00325<br>[-0.00286,0.00936]  |
| Probably yes          | 0.0105<br>[-0.00922,0.0302]    |
| Definitely yes        | -0.0161<br>[-0.0464,0.0141]    |
| <hr/>                 |                                |
| <b>DN(70%)+RC(S)</b>  |                                |
| Definitely no         | 0.000300<br>[-0.00407,0.00467] |
| Probably no           | 0.000420<br>[-0.00571,0.00655] |
| Probably yes          | 0.00139<br>[-0.0189,0.0217]    |
| Definitely yes        | -0.00211<br>[-0.0329,0.0287]   |
| <hr/>                 |                                |
| <b>DN(70%)+RC(SE)</b> |                                |
| Definitely no         | 0.00267<br>[-0.00198,0.00733]  |
| Probably no           | 0.00359<br>[-0.00265,0.00983]  |
| Probably yes          | 0.0115<br>[-0.00850,0.0316]    |
| Definitely yes        | -0.0178<br>[-0.0486,0.0130]    |
| <hr/>                 |                                |
| <i>N</i>              | 5784                           |

95% confidence intervals in brackets

\*  $p < 0.05$ , \*\*  $p < 0.01$ , \*\*\*  $p < 0.001$
