# Supplementary material for: When do persuasive messages on vaccine safety steer COVID-19 vaccine acceptance and recommendations? Behavioral insights from a randomised controlled experiment in Malaysia
Source: bioRxiv or medRxiv preprint supplement (doi:10.1101/2022.04.17.22273942), 2022-04-18
Supplement: Supplementary file [file media-5.pdf]

**Table S3: Average marginal effects for intention to recommend the COVID-19 vaccine to healthy adults, elderly, and people with any pre-existing health conditions, in each experimental arm relative to control arm.**

|                | <b>Healthy adults</b><br>Marginal effects<br>[95% Confidence<br>Interval] | <b>Elderly</b><br>Marginal effects<br>[95% Confidence<br>Interval] | <b>Health condition</b><br>Marginal effects<br>[95% Confidence<br>Interval] |
|----------------|---------------------------------------------------------------------------|--------------------------------------------------------------------|-----------------------------------------------------------------------------|
| <b>DN(70%)</b> |                                                                           |                                                                    |                                                                             |
| Disagree       | 0.0148*<br>[0.00255,0.0271]                                               | 0.0121<br>[-0.00394,0.0281]                                        | -0.00964<br>[-0.0298,0.0105]                                                |
| Not sure       | 0.0237*<br>[0.00411,0.0432]                                               | 0.0148<br>[-0.00480,0.0344]                                        | -0.00919<br>[-0.0284,0.0100]                                                |
| Agree          | -0.0385*<br>[-0.0702,-0.00673]                                            | -0.0269<br>[-0.0625,0.00873]                                       | 0.0188<br>[-0.0204,0.0581]                                                  |
| <b>DN</b>      |                                                                           |                                                                    |                                                                             |
| Disagree       | 0.0111<br>[-0.00108,0.0232]                                               | -0.000137<br>[-0.0160,0.0157]                                      | -0.0411***<br>[-0.0616,-0.0205]                                             |
| Not sure       | 0.0174<br>[-0.00167,0.0365]                                               | -0.000165<br>[-0.0193,0.0189]                                      | -0.0391***<br>[-0.0588,-0.0195]                                             |
| Agree          | -0.0285<br>[-0.0596,0.00271]                                              | 0.000302<br>[-0.0347,0.0353]                                       | 0.0802***<br>[0.0405,0.120]                                                 |
| <b>HCW</b>     |                                                                           |                                                                    |                                                                             |
| Disagree       | 0.00320<br>[-0.00891,0.0153]                                              | 0.0106<br>[-0.00536,0.0266]                                        | -0.0150<br>[-0.0352,0.00529]                                                |
| Not sure       | 0.00485<br>[-0.0135,0.0232]                                               | 0.0130<br>[-0.00653,0.0326]                                        | -0.0143<br>[-0.0337,0.00507]                                                |
| Agree          | -0.00806<br>[-0.0385,0.0224]                                              | -0.0236<br>[-0.0592,0.0119]                                        | 0.0293<br>[-0.0103,0.0688]                                                  |
| <b>NF</b>      |                                                                           |                                                                    |                                                                             |
| Disagree       | 0.0100<br>[-0.00207,0.0221]                                               | 0.00806<br>[-0.00783,0.0240]                                       | -0.0187<br>[-0.0387,0.00132]                                                |
| Not sure       | 0.0157<br>[-0.00323,0.0347]                                               | 0.00984<br>[-0.00954,0.0292]                                       | -0.0179<br>[-0.0370,0.00128]                                                |
| Agree          | -0.0258<br>[-0.0568,0.00527]                                              | -0.0179<br>[-0.0532,0.0174]                                        | 0.0366<br>[-0.00246,0.0756]                                                 |
| <b>PF</b>      |                                                                           |                                                                    |                                                                             |
| Disagree       | 0.0102<br>[-0.00189,0.0222]                                               | 0.00514<br>[-0.0105,0.0208]                                        | -0.0288**<br>[-0.0489,-0.00859]                                             |
| Not sure       | 0.0159<br>[-0.00293,0.0348]                                               | 0.00624<br>[-0.0128,0.0253]                                        | -0.0275**<br>[-0.0469,-0.00821]                                             |
| Agree          | -0.0261<br>[-0.0569,0.00479]                                              | -0.0114<br>[-0.0461,0.0233]                                        | 0.0563**<br>[0.0171,0.0955]                                                 |
| <b>RC(S)</b>   |                                                                           |                                                                    |                                                                             |
| Disagree       | 0.0163**                                                                  | 0.0106                                                             | -0.0171                                                                     |

|          |                                |                             |                              |
|----------|--------------------------------|-----------------------------|------------------------------|
|          | [0.00393,0.0287]               | [-0.00526,0.0265]           | [-0.0372,0.00287]            |
| Not sure | 0.0262**<br>[0.00637,0.0461]   | 0.0130<br>[-0.00641,0.0324] | -0.0164<br>[-0.0356,0.00278] |
| Agree    | -0.0425**<br>[-0.0746,-0.0104] | -0.0236<br>[-0.0588,0.0117] | 0.0336<br>[-0.00553,0.0726]  |

---

**RC(SE)**

|          |                              |                              |                              |
|----------|------------------------------|------------------------------|------------------------------|
| Disagree | 0.00534<br>[-0.00663,0.0173] | 0.00154<br>[-0.0142,0.0173]  | -0.0148<br>[-0.0349,0.00533] |
| Not sure | 0.00818<br>[-0.0101,0.0265]  | 0.00186<br>[-0.0172,0.0209]  | -0.0141<br>[-0.0334,0.00513] |
| Agree    | -0.0135<br>[-0.0438,0.0168]  | -0.00339<br>[-0.0382,0.0314] | 0.0289<br>[-0.0104,0.0682]   |

---

**DN(70%)+DN**

|          |                                |                              |                                |
|----------|--------------------------------|------------------------------|--------------------------------|
| Disagree | 0.0127*<br>[0.000460,0.0249]   | 0.00193<br>[-0.0135,0.0174]  | -0.0213*<br>[-0.0415,-0.00114] |
| Not sure | 0.0201*<br>[0.000739,0.0394]   | 0.00234<br>[-0.0163,0.0210]  | -0.0204*<br>[-0.0398,-0.00107] |
| Agree    | -0.0328*<br>[-0.0643,-0.00125] | -0.00427<br>[-0.0383,0.0298] | 0.0417*<br>[0.00238,0.0811]    |

---

**DN(70%)+HCW**

|          |                              |                               |                                |
|----------|------------------------------|-------------------------------|--------------------------------|
| Disagree | 0.00418<br>[-0.00782,0.0162] | -0.00548<br>[-0.0209,0.00989] | -0.0240*<br>[-0.0441,-0.00396] |
| Not sure | 0.00637<br>[-0.0119,0.0246]  | -0.00653<br>[-0.0248,0.0118]  | -0.0230*<br>[-0.0423,-0.00372] |
| Agree    | -0.0105<br>[-0.0408,0.0197]  | 0.0120<br>[-0.0217,0.0457]    | 0.0470*<br>[0.00790,0.0862]    |

---

**DN(70%)+NF**

|          |                              |                              |                              |
|----------|------------------------------|------------------------------|------------------------------|
| Disagree | 0.00936<br>[-0.00304,0.0218] | 0.0141<br>[-0.00210,0.0302]  | -0.0123<br>[-0.0326,0.00789] |
| Not sure | 0.0146<br>[-0.00477,0.0340]  | 0.0173<br>[-0.00254,0.0371]  | -0.0118<br>[-0.0311,0.00755] |
| Agree    | -0.0240<br>[-0.0558,0.00778] | -0.0313<br>[-0.0673,0.00462] | 0.0241<br>[-0.0154,0.0637]   |

---

**DN(70%)+PF**

|          |                              |                                |                               |
|----------|------------------------------|--------------------------------|-------------------------------|
| Disagree | 0.0101<br>[-0.00188,0.0221]  | 0.0159<br>[-0.0000648,0.0319]  | -0.0198<br>[-0.0398,0.000177] |
| Not sure | 0.0159<br>[-0.00292,0.0347]  | 0.0196<br>[-0.0000347,0.0392]  | -0.0190<br>[-0.0381,0.000176] |
| Agree    | -0.0260<br>[-0.0568,0.00477] | -0.0355<br>[-0.0711,0.0000810] | 0.0387<br>[-0.000198,0.0777]  |

---

**DN(70%)+RC(S)**

|          |         |         |          |
|----------|---------|---------|----------|
| Disagree | 0.0124* | 0.00325 | -0.0235* |
|----------|---------|---------|----------|

|                       |                                 |                              |                                |
|-----------------------|---------------------------------|------------------------------|--------------------------------|
|                       | [0.000140,0.0247]               | [-0.0129,0.0194]             | [-0.0436,-0.00327]             |
| Not sure              | 0.0196*<br>[0.000215,0.0390]    | 0.00393<br>[-0.0156,0.0235]  | -0.0225*<br>[-0.0418,-0.00310] |
| Agree                 | -0.0320*<br>[-0.0636,-0.000404] | -0.00718<br>[-0.0428,0.0285] | 0.0459*<br>[0.00658,0.0853]    |
| <hr/>                 |                                 |                              |                                |
| <b>DN(70%)+RC(SE)</b> |                                 |                              |                                |
| Disagree              | 0.00744<br>[-0.00497,0.0199]    | 0.0136<br>[-0.00261,0.0299]  | -0.00524<br>[-0.0254,0.0149]   |
| Not sure              | 0.0115<br>[-0.00770,0.0307]     | 0.0167<br>[-0.00317,0.0366]  | -0.00499<br>[-0.0242,0.0142]   |
| Agree                 | -0.0190<br>[-0.0506,0.0127]     | -0.0304<br>[-0.0665,0.00577] | 0.0102<br>[-0.0291,0.0496]     |
| <hr/>                 |                                 |                              |                                |
| <i>N</i>              | 5784                            | 5784                         | 5784                           |
| <hr/>                 |                                 |                              |                                |

95% confidence intervals in brackets

\*  $p < 0.05$ , \*\*  $p < 0.01$ , \*\*\*  $p < 0.001$
