# Supplementary material for: When do persuasive messages on vaccine safety steer COVID-19 vaccine acceptance and recommendations? Behavioral insights from a randomised controlled experiment in Malaysia
Source: bioRxiv or medRxiv preprint supplement (doi:10.1101/2022.04.17.22273942), 2022-04-18
Supplement: Supplementary file [file media-6.pdf]

**Table S4: Chi-square analysis describing associations between all experimental arms and proportion of hesitant participants who cited reasons of vaccine safety or side effect concerns after message exposure.**

| <b>Hesitancy to:</b>                                            | <b>Intention to vaccinate</b> |                | <b>Recommend healthy adults</b> |                | <b>Recommend elderly</b> |                | <b>Recommend people with health conditions</b> |                |
|-----------------------------------------------------------------|-------------------------------|----------------|---------------------------------|----------------|--------------------------|----------------|------------------------------------------------|----------------|
|                                                                 | <b>No (%)</b>                 | <b>Yes (%)</b> | <b>No (%)</b>                   | <b>Yes (%)</b> | <b>No (%)</b>            | <b>Yes (%)</b> | <b>No (%)</b>                                  | <b>Yes (%)</b> |
| <b>Worried about the safety or side effects of the vaccine.</b> |                               |                |                                 |                |                          |                |                                                |                |
| <b>DN(70%)</b>                                                  | 22.78                         | 77.22          | 30.00                           | 70.00          | 20.00                    | 80.00          | 18.95                                          | 81.05          |
| <b>DN</b>                                                       | 27.74                         | 72.26          | 28.81                           | 71.19          | 20.43                    | 79.57          | 20.92                                          | 79.08          |
| <b>HCW</b>                                                      | 22.86                         | 77.14          | 33.33                           | 66.67          | 14.85                    | 85.15          | 14.55                                          | 85.45          |
| <b>NF</b>                                                       | 32.67                         | 67.33          | 34.48                           | 65.52          | 22.86                    | 77.14          | 25.53                                          | 74.47          |
| <b>PF</b>                                                       | 21.92                         | 78.08          | 31.15                           | 68.85          | 14.15                    | 85.85          | 20.24                                          | 79.76          |
| <b>RC(S)</b>                                                    | 26.67                         | 73.33          | 29.51                           | 70.49          | 18.18                    | 81.82          | 19.78                                          | 80.22          |
| <b>RC(SE)</b>                                                   | 20.53                         | 79.47          | 19.3                            | 80.7           | 25.24                    | 74.76          | 19.34                                          | 80.66          |
| <b>Control</b>                                                  | 18.71                         | 81.29          | 38.46                           | 61.54          | 23.08                    | 76.92          | 20.32                                          | 79.68          |
| <b>DN(70%) + DN</b>                                             | 27.04                         | 72.96          | 26.56                           | 73.44          | 17.12                    | 82.88          | 23.56                                          | 76.44          |
| <b>DN(70%) + HCW</b>                                            | 22.73                         | 77.27          | 27.27                           | 72.73          | 15.6                     | 84.4           | 19.66                                          | 80.34          |
| <b>DN(70%) + NF</b>                                             | 29.33                         | 70.67          | 28.07                           | 71.93          | 20.41                    | 79.59          | 23.3                                           | 76.7           |
| <b>DN(70%) + PF</b>                                             | 30.67                         | 69.33          | 40.00                           | 60.00          | 28.57                    | 71.43          | 21.76                                          | 78.24          |
| <b>DN(70%) + RC(S)</b>                                          | 24.32                         | 75.68          | 30.77                           | 69.23          | 18.89                    | 81.11          | 21.69                                          | 78.31          |
| <b>DN(70%) + RC(SE)</b>                                         | 27.86                         | 72.14          | 24.44                           | 75.56          | 18.45                    | 81.55          | 19.35                                          | 80.65          |
| <b>Pearson chi-square:</b>                                      | 16.7902                       |                | 9.7281                          |                | 14.3616                  |                | 9.3312                                         |                |
| <b>P-Value:</b>                                                 | 0.209                         |                | 0.716                           |                | 0.349                    |                | 0.747                                          |                |
