# Supplementary material for: When do persuasive messages on vaccine safety steer COVID-19 vaccine acceptance and recommendations? Behavioral insights from a randomised controlled experiment in Malaysia
Source: bioRxiv or medRxiv preprint supplement (doi:10.1101/2022.04.17.22273942), 2022-04-18
Supplement: Supplementary file [file media-7.pdf]

**Table S5: Average marginal treatment effects based on interaction with age category with respect to selecting the intent option for definitely accepting the COVID-19 vaccine, and agreeing to recommend the vaccine to healthy adults, elderly, and people with pre-existing health conditions; in each experimental arm relative to control arm.**

|                    | <b>Intention to vaccinate</b>                 | <b>Healthy adults</b>                         | <b>Elderly</b>                                | <b>Health condition</b>                       |
|--------------------|-----------------------------------------------|-----------------------------------------------|-----------------------------------------------|-----------------------------------------------|
|                    | Marginal effects<br>[95% Confidence Interval] | Marginal effects<br>[95% Confidence Interval] | Marginal effects<br>[95% Confidence Interval] | Marginal effects<br>[95% Confidence Interval] |
| <b>DN(70%)</b>     |                                               |                                               |                                               |                                               |
| Age ≤ 30           | -0.0210<br>[-0.0685,0.0265]                   | -0.0357<br>[-0.0840,0.0127]                   | 0.0127<br>[-0.0424,0.0677]                    | 0.00830<br>[-0.0570,0.0736]                   |
| Age > 30           | -0.0289<br>[-0.0680,0.0103]                   | -0.0387<br>[-0.0803,0.00287]                  | -0.0512*<br>[-0.0974,-0.00510]                | 0.0242<br>[-0.0249,0.0732]                    |
| <b>DN</b>          |                                               |                                               |                                               |                                               |
| Age ≤ 30           | 0.0207<br>[-0.0273,0.0687]                    | -0.0280<br>[-0.0750,0.0189]                   | 0.0131<br>[-0.0420,0.0681]                    | 0.0656*<br>[0.00108,0.130]                    |
| Age > 30           | -0.00321<br>[-0.0435,0.0371]                  | -0.0278<br>[-0.0687,0.0132]                   | -0.00806<br>[-0.0532,0.0370]                  | 0.0873***<br>[0.0370,0.138]                   |
| <b>HCW</b>         |                                               |                                               |                                               |                                               |
| Age ≤ 30           | 0.0121<br>[-0.0352,0.0593]                    | -0.0128<br>[-0.0576,0.0321]                   | -0.00853<br>[-0.0631,0.0461]                  | 0.0249<br>[-0.0408,0.0906]                    |
| Age > 30           | -0.0147<br>[-0.0553,0.0259]                   | -0.00527<br>[-0.0462,0.0356]                  | -0.0349<br>[-0.0814,0.0116]                   | 0.0308<br>[-0.0187,0.0803]                    |
| <b>NF</b>          |                                               |                                               |                                               |                                               |
| Age ≤ 30           | -0.00890<br>[-0.0559,0.0381]                  | -0.0302<br>[-0.0778,0.0174]                   | 0.000910<br>[-0.0557,0.0575]                  | 0.0518<br>[-0.0124,0.116]                     |
| Age > 30           | -0.0493*<br>[-0.0892,-0.00942]                | -0.0218<br>[-0.0623,0.0186]                   | -0.0286<br>[-0.0735,0.0162]                   | 0.0263<br>[-0.0228,0.0753]                    |
| <b>PF</b>          |                                               |                                               |                                               |                                               |
| Age ≤ 30           | 0.0224<br>[-0.0256,0.0703]                    | -0.0513*<br>[-0.102,-0.000985]                | 0.00780<br>[-0.0468,0.0624]                   | 0.0574<br>[-0.00624,0.121]                    |
| Age > 30           | -0.00322<br>[-0.0428,0.0363]                  | -0.0104<br>[-0.0495,0.0286]                   | -0.0234<br>[-0.0682,0.0213]                   | 0.0529*<br>[0.00324,0.103]                    |
| <b>RC(S)</b>       |                                               |                                               |                                               |                                               |
| Age ≤ 30           | 0.0192<br>[-0.0277,0.0661]                    | -0.0329<br>[-0.0800,0.0143]                   | 0.00768<br>[-0.0447,0.0600]                   | 0.0432<br>[-0.0192,0.106]                     |
| Age > 30           | -0.0186<br>[-0.0585,0.0212]                   | -0.0487*<br>[-0.0917,-0.00572]                | -0.0504*<br>[-0.0977,-0.00300]                | 0.0219<br>[-0.0282,0.0720]                    |
| <b>RC(SE)</b>      |                                               |                                               |                                               |                                               |
| Age ≤ 30           | 0.0184<br>[-0.0299,0.0668]                    | -0.0222<br>[-0.0685,0.0240]                   | -0.000669<br>[-0.0546,0.0533]                 | 0.00916<br>[-0.0544,0.0728]                   |
| Age > 30           | -0.0277<br>[-0.0674,0.0119]                   | -0.00708<br>[-0.0467,0.0325]                  | -0.00515<br>[-0.0505,0.0402]                  | 0.0391<br>[-0.0109,0.0891]                    |
| <b>DN(70%)+DN</b>  |                                               |                                               |                                               |                                               |
| Age ≤ 30           | 0.00925<br>[-0.0376,0.0561]                   | -0.0237<br>[-0.0697,0.0222]                   | 0.00825<br>[-0.0450,0.0615]                   | 0.0340<br>[-0.0293,0.0974]                    |
| Age > 30           | -0.0249<br>[-0.0643,0.0145]                   | -0.0386<br>[-0.0809,0.00374]                  | -0.0125<br>[-0.0565,0.0315]                   | 0.0432<br>[-0.00711,0.0935]                   |
| <b>DN(70%)+HCW</b> |                                               |                                               |                                               |                                               |
| Age ≤ 30           | 0.0138                                        | -0.0163                                       | 0.0221                                        | 0.0166                                        |

|                       |                                |                              |                              |                             |
|-----------------------|--------------------------------|------------------------------|------------------------------|-----------------------------|
|                       | [-0.0333,0.0610]               | [-0.0612,0.0285]             | [-0.0300,0.0741]             | [-0.0460,0.0792]            |
| Age > 30              | -0.0281<br>[-0.0680,0.0117]    | -0.00652<br>[-0.0469,0.0339] | 0.00483<br>[-0.0392,0.0488]  | 0.0651*<br>[0.0149,0.115]   |
| <b>DN(70%)+NF</b>     |                                |                              |                              |                             |
| Age ≤ 30              | -0.0175<br>[-0.0647,0.0298]    | -0.00655<br>[-0.0526,0.0395] | -0.0202<br>[-0.0768,0.0364]  | 0.0214<br>[-0.0422,0.0850]  |
| Age > 30              | -0.0481*<br>[-0.0883,-0.00788] | -0.0340<br>[-0.0767,0.00858] | -0.0388<br>[-0.0850,0.00755] | 0.0220<br>[-0.0284,0.0724]  |
| <b>DN(70%)+PF</b>     |                                |                              |                              |                             |
| Age ≤ 30              | -0.00288<br>[-0.0507,0.0450]   | -0.0227<br>[-0.0698,0.0244]  | -0.0520<br>[-0.109,0.00516]  | -0.0198<br>[-0.0840,0.0444] |
| Age > 30              | -0.0246<br>[-0.0637,0.0145]    | -0.0261<br>[-0.0663,0.0142]  | -0.0244<br>[-0.0695,0.0208]  | 0.0740**<br>[0.0252,0.123]  |
| <b>DN(70%)+RC(S)</b>  |                                |                              |                              |                             |
| Age ≤ 30              | 0.0183<br>[-0.0304,0.0671]     | -0.0155<br>[-0.0626,0.0315]  | 0.0147<br>[-0.0412,0.0705]   | 0.0393<br>[-0.0238,0.103]   |
| Age > 30              | -0.0152<br>[-0.0549,0.0245]    | -0.0395<br>[-0.0813,0.00236] | -0.0216<br>[-0.0678,0.0246]  | 0.0463<br>[-0.00412,0.0966] |
| <b>DN(70%)+RC(SE)</b> |                                |                              |                              |                             |
| Age ≤ 30              | 0.00311<br>[-0.0448,0.0510]    | -0.0113<br>[-0.0580,0.0353]  | -0.0203<br>[-0.0764,0.0358]  | 0.0187<br>[-0.0452,0.0826]  |
| Age > 30              | -0.0322<br>[-0.0723,0.00791]   | -0.0235<br>[-0.0657,0.0187]  | -0.0375<br>[-0.0845,0.00940] | 0.00169<br>[-0.0482,0.0516] |
| <i>N</i>              | 5784                           | 5784                         | 5784                         | 5784                        |
