# Supplementary material for: When do persuasive messages on vaccine safety steer COVID-19 vaccine acceptance and recommendations? Behavioral insights from a randomised controlled experiment in Malaysia
Source: bioRxiv or medRxiv preprint supplement (doi:10.1101/2022.04.17.22273942), 2022-04-18
Supplement: Supplementary file [file media-8.pdf]

**Table S6: Average marginal treatment effects based on interaction with sex with respect to selecting the intent option for definitely accepting the COVID-19 vaccine, and agreeing to recommend the vaccine to healthy adults, elderly, and people with pre-existing health conditions; in each experimental arm relative to control arm.**

|                    | <b>Intention to vaccinate</b><br>Marginal effects<br>[95% Confidence Interval] | <b>Healthy adults</b><br>Marginal effects<br>[95% Confidence Interval] | <b>Elderly</b><br>Marginal effects<br>[95% Confidence Interval] | <b>Health condition</b><br>Marginal effects<br>[95% Confidence Interval] |
|--------------------|--------------------------------------------------------------------------------|------------------------------------------------------------------------|-----------------------------------------------------------------|--------------------------------------------------------------------------|
| <b>DN(70%)</b>     |                                                                                |                                                                        |                                                                 |                                                                          |
| Male               | -0.0306<br>[-0.0743,0.0132]                                                    | -0.0352<br>[-0.0800,0.00960]                                           | -0.0149<br>[-0.0663,0.0364]                                     | 0.0333<br>[-0.0228,0.0894]                                               |
| Female             | -0.0208<br>[-0.0626,0.0211]                                                    | -0.0419<br>[-0.0869,0.00317]                                           | -0.0371<br>[-0.0866,0.0124]                                     | 0.00432<br>[-0.0507,0.0593]                                              |
| <b>DN</b>          |                                                                                |                                                                        |                                                                 |                                                                          |
| Male               | 0.00891<br>[-0.0358,0.0536]                                                    | -0.0228<br>[-0.0658,0.0202]                                            | 0.00913<br>[-0.0423,0.0605]                                     | 0.0677*<br>[0.0120,0.123]                                                |
| Female             | 0.00378<br>[-0.0390,0.0466]                                                    | -0.0347<br>[-0.0799,0.0106]                                            | -0.00717<br>[-0.0547,0.0403]                                    | 0.0942**<br>[0.0379,0.151]                                               |
| <b>HCW</b>         |                                                                                |                                                                        |                                                                 |                                                                          |
| Male               | -0.0313<br>[-0.0747,0.0122]                                                    | -0.0203<br>[-0.0649,0.0242]                                            | -0.00954<br>[-0.0605,0.0415]                                    | 0.0320<br>[-0.0231,0.0872]                                               |
| Female             | 0.0271<br>[-0.0176,0.0719]                                                     | 0.00283<br>[-0.0391,0.0447]                                            | -0.0362<br>[-0.0857,0.0133]                                     | 0.0273<br>[-0.0295,0.0841]                                               |
| <b>NF</b>          |                                                                                |                                                                        |                                                                 |                                                                          |
| Male               | -0.0461*<br>[-0.0900,-0.00210]                                                 | -0.0397<br>[-0.0844,0.00497]                                           | -0.00518<br>[-0.0564,0.0461]                                    | 0.0449<br>[-0.0109,0.101]                                                |
| Female             | -0.0205<br>[-0.0626,0.0216]                                                    | -0.0114<br>[-0.0545,0.0316]                                            | -0.0290<br>[-0.0774,0.0195]                                     | 0.0277<br>[-0.0268,0.0823]                                               |
| <b>PF</b>          |                                                                                |                                                                        |                                                                 |                                                                          |
| Male               | -0.00465<br>[-0.0489,0.0396]                                                   | -0.0202<br>[-0.0646,0.0242]                                            | 0.0124<br>[-0.0386,0.0634]                                      | 0.0736**<br>[0.0179,0.129]                                               |
| Female             | 0.0177<br>[-0.0244,0.0598]                                                     | -0.0312<br>[-0.0743,0.0119]                                            | -0.0320<br>[-0.0793,0.0153]                                     | 0.0391<br>[-0.0160,0.0942]                                               |
| <b>RC(S)</b>       |                                                                                |                                                                        |                                                                 |                                                                          |
| Male               | -0.0254<br>[-0.0688,0.0181]                                                    | -0.0382<br>[-0.0822,0.00578]                                           | -0.0137<br>[-0.0651,0.0376]                                     | 0.0401<br>[-0.0152,0.0955]                                               |
| Female             | 0.0190<br>[-0.0235,0.0614]                                                     | -0.0476*<br>[-0.0947,-0.000469]                                        | -0.0318<br>[-0.0801,0.0164]                                     | 0.0266<br>[-0.0285,0.0817]                                               |
| <b>RC(SE)</b>      |                                                                                |                                                                        |                                                                 |                                                                          |
| Male               | -0.00755<br>[-0.0521,0.0370]                                                   | -0.00113<br>[-0.0428,0.0406]                                           | 0.0411<br>[-0.00898,0.0912]                                     | 0.0580*<br>[0.00182,0.114]                                               |
| Female             | -0.0114<br>[-0.0535,0.0307]                                                    | -0.0260<br>[-0.0700,0.0181]                                            | -0.0429<br>[-0.0914,0.00563]                                    | 0.00147<br>[-0.0536,0.0565]                                              |
| <b>DN(70%)+DN</b>  |                                                                                |                                                                        |                                                                 |                                                                          |
| Male               | -0.0286<br>[-0.0717,0.0144]                                                    | -0.0287<br>[-0.0719,0.0146]                                            | -0.00707<br>[-0.0576,0.0435]                                    | 0.0323<br>[-0.0231,0.0876]                                               |
| Female             | 0.00629<br>[-0.0359,0.0485]                                                    | -0.0375<br>[-0.0836,0.00851]                                           | -0.00104<br>[-0.0466,0.0446]                                    | 0.0521<br>[-0.00375,0.108]                                               |
| <b>DN(70%)+HCW</b> |                                                                                |                                                                        |                                                                 |                                                                          |
| Male               | -0.0337                                                                        | -0.0243                                                                | 0.0155                                                          | 0.0233                                                                   |

|                       |                               |                              |                              |                             |
|-----------------------|-------------------------------|------------------------------|------------------------------|-----------------------------|
|                       | [-0.0771,0.00977]             | [-0.0673,0.0187]             | [-0.0340,0.0651]             | [-0.0324,0.0790]            |
| Female                | 0.0118<br>[-0.0309,0.0545]    | 0.00619<br>[-0.0364,0.0488]  | 0.00999<br>[-0.0357,0.0557]  | 0.0698*<br>[0.0149,0.125]   |
| <b>DN(70%)+NF</b>     |                               |                              |                              |                             |
| Male                  | -0.0583**<br>[-0.102,-0.0150] | -0.0305<br>[-0.0741,0.0131]  | -0.0407<br>[-0.0931,0.0117]  | 0.0326<br>[-0.0230,0.0882]  |
| Female                | -0.00992<br>[-0.0542,0.0344]  | -0.0138<br>[-0.0612,0.0336]  | -0.0172<br>[-0.0669,0.0325]  | 0.0155<br>[-0.0406,0.0716]  |
| <b>DN(70%)+PF</b>     |                               |                              |                              |                             |
| Male                  | -0.0272<br>[-0.0710,0.0165]   | -0.0252<br>[-0.0686,0.0183]  | -0.0229<br>[-0.0743,0.0285]  | 0.0452<br>[-0.00948,0.1000] |
| Female                | -0.00577<br>[-0.0475,0.0360]  | -0.0271<br>[-0.0707,0.0165]  | -0.0465<br>[-0.0957,0.00279] | 0.0322<br>[-0.0231,0.0875]  |
| <b>DN(70%)+RC(S)</b>  |                               |                              |                              |                             |
| Male                  | -0.0134<br>[-0.0572,0.0304]   | -0.0229<br>[-0.0664,0.0207]  | 0.00517<br>[-0.0458,0.0561]  | 0.0673*<br>[0.0125,0.122]   |
| Female                | 0.00870<br>[-0.0346,0.0520]   | -0.0418<br>[-0.0877,0.00418] | -0.0178<br>[-0.0678,0.0322]  | 0.0234<br>[-0.0329,0.0797]  |
| <b>DN(70%)+RC(SE)</b> |                               |                              |                              |                             |
| Male                  | -0.0412<br>[-0.0855,0.00299]  | -0.00707<br>[-0.0501,0.0359] | -0.0366<br>[-0.0895,0.0162]  | 0.0129<br>[-0.0425,0.0683]  |
| Female                | 0.00501<br>[-0.0381,0.0481]   | -0.0320<br>[-0.0785,0.0145]  | -0.0217<br>[-0.0709,0.0275]  | 0.00761<br>[-0.0482,0.0634] |
| <i>N</i>              | 5784                          | 5784                         | 5784                         | 5784                        |
