# Supplementary material for: When do persuasive messages on vaccine safety steer COVID-19 vaccine acceptance and recommendations? Behavioral insights from a randomised controlled experiment in Malaysia
Source: bioRxiv or medRxiv preprint supplement (doi:10.1101/2022.04.17.22273942), 2022-04-18
Supplement: Supplementary file [file media-9.pdf]

**Table S7: Average marginal treatment effects based on interaction with education level with respect to selecting the intent option for definitely accepting the COVID-19 vaccine, and agreeing to recommend the vaccine to healthy adults, elderly, and people with pre-existing health conditions; in each experimental arm relative to control arm.**

|                    | <b>Intention to vaccinate</b><br>Marginal effects<br>[95% Confidence Interval] | <b>Healthy adults</b><br>Marginal effects<br>[95% Confidence Interval] | <b>Elderly</b><br>Marginal effects<br>[95% Confidence Interval] | <b>Health condition</b><br>Marginal effects<br>[95% Confidence Interval] |
|--------------------|--------------------------------------------------------------------------------|------------------------------------------------------------------------|-----------------------------------------------------------------|--------------------------------------------------------------------------|
| <b>DN(70%)</b>     |                                                                                |                                                                        |                                                                 |                                                                          |
| Below tertiary     | -0.0209<br>[-0.0633,0.0214]                                                    | -0.00277<br>[-0.0465,0.0410]                                           | -0.0429<br>[-0.0917,0.00600]                                    | 0.000846<br>[-0.0547,0.0564]                                             |
| Above tertiary     | -0.0305<br>[-0.0739,0.0129]                                                    | -0.0792***<br>[-0.126,-0.0322]                                         | -0.00658<br>[-0.0590,0.0458]                                    | 0.0287<br>[-0.0270,0.0844]                                               |
| <b>DN</b>          |                                                                                |                                                                        |                                                                 |                                                                          |
| Below tertiary     | 0.00112<br>[-0.0430,0.0453]                                                    | -0.0113<br>[-0.0572,0.0346]                                            | 0.00700<br>[-0.0417,0.0557]                                     | 0.0726*<br>[0.0165,0.129]                                                |
| Above tertiary     | 0.0123<br>[-0.0311,0.0558]                                                     | -0.0455*<br>[-0.0875,-0.00349]                                         | -0.00643<br>[-0.0565,0.0436]                                    | 0.116***<br>[0.0574,0.174]                                               |
| <b>HCW</b>         |                                                                                |                                                                        |                                                                 |                                                                          |
| Below tertiary     | -0.0143<br>[-0.0569,0.0284]                                                    | 0.0163<br>[-0.0269,0.0595]                                             | -0.0415<br>[-0.0911,0.00803]                                    | 0.00298<br>[-0.0539,0.0599]                                              |
| Above tertiary     | 0.0125<br>[-0.0337,0.0587]                                                     | -0.0336<br>[-0.0770,0.00974]                                           | -0.00318<br>[-0.0543,0.0479]                                    | 0.0502<br>[-0.00489,0.105]                                               |
| <b>NF</b>          |                                                                                |                                                                        |                                                                 |                                                                          |
| Below tertiary     | -0.0315<br>[-0.0743,0.0114]                                                    | 0.00302<br>[-0.0406,0.0466]                                            | -0.0186<br>[-0.0673,0.0300]                                     | 0.00534<br>[-0.0503,0.0610]                                              |
| Above tertiary     | -0.0342<br>[-0.0776,0.00920]                                                   | -0.0567*<br>[-0.101,-0.0121]                                           | -0.0179<br>[-0.0690,0.0333]                                     | 0.0618*<br>[0.00695,0.117]                                               |
| <b>PF</b>          |                                                                                |                                                                        |                                                                 |                                                                          |
| Below tertiary     | 0.00972<br>[-0.0321,0.0515]                                                    | -0.0128<br>[-0.0566,0.0311]                                            | -0.0214<br>[-0.0683,0.0255]                                     | 0.0183<br>[-0.0357,0.0724]                                               |
| Above tertiary     | 0.00348<br>[-0.0420,0.0490]                                                    | -0.0358<br>[-0.0796,0.00802]                                           | 0.00157<br>[-0.0507,0.0538]                                     | 0.0895**<br>[0.0314,0.148]                                               |
| <b>RC(S)</b>       |                                                                                |                                                                        |                                                                 |                                                                          |
| Below tertiary     | 0.00604<br>[-0.0363,0.0484]                                                    | -0.0377<br>[-0.0849,0.00951]                                           | -0.0459<br>[-0.0950,0.00314]                                    | -0.0181<br>[-0.0737,0.0375]                                              |
| Above tertiary     | -0.0138<br>[-0.0576,0.0301]                                                    | -0.0446*<br>[-0.0881,-0.00114]                                         | 0.00356<br>[-0.0473,0.0544]                                     | 0.0815**<br>[0.0263,0.137]                                               |
| <b>RC(SE)</b>      |                                                                                |                                                                        |                                                                 |                                                                          |
| Below tertiary     | -0.00230<br>[-0.0453,0.0407]                                                   | 0.00582<br>[-0.0381,0.0498]                                            | -0.0144<br>[-0.0634,0.0345]                                     | -0.00624<br>[-0.0626,0.0501]                                             |
| Above tertiary     | -0.0177<br>[-0.0612,0.0258]                                                    | -0.0326<br>[-0.0742,0.00897]                                           | 0.00795<br>[-0.0415,0.0574]                                     | 0.0585*<br>[0.00354,0.113]                                               |
| <b>DN(70%)+DN</b>  |                                                                                |                                                                        |                                                                 |                                                                          |
| Below tertiary     | -0.0179<br>[-0.0596,0.0238]                                                    | -0.0219<br>[-0.0667,0.0228]                                            | -0.0159<br>[-0.0629,0.0312]                                     | -0.0126<br>[-0.0686,0.0434]                                              |
| Above tertiary     | -0.000547<br>[-0.0451,0.0440]                                                  | -0.0382<br>[-0.0832,0.00671]                                           | 0.00924<br>[-0.0403,0.0588]                                     | 0.0929**<br>[0.0373,0.148]                                               |
| <b>DN(70%)+HCW</b> |                                                                                |                                                                        |                                                                 |                                                                          |
| Below tertiary     | -0.00594                                                                       | 0.0155                                                                 | 0.0235                                                          | 0.0310                                                                   |

|                       |                              |                               |                               |                             |
|-----------------------|------------------------------|-------------------------------|-------------------------------|-----------------------------|
|                       | [-0.0502,0.0383]             | [-0.0273,0.0583]              | [-0.0240,0.0711]              | [-0.0257,0.0877]            |
| Above tertiary        | -0.0151<br>[-0.0569,0.0268]  | -0.0380<br>[-0.0810,0.00503]  | 0.00278<br>[-0.0447,0.0503]   | 0.0597*<br>[0.00578,0.114]  |
| <b>DN(70%)+NF</b>     |                              |                               |                               |                             |
| Below tertiary        | -0.0414<br>[-0.0847,0.00202] | -0.0117<br>[-0.0582,0.0349]   | -0.0723**<br>[-0.124,-0.0209] | -0.0245<br>[-0.0805,0.0314] |
| Above tertiary        | -0.0287<br>[-0.0722,0.0149]  | -0.0353<br>[-0.0786,0.00793]  | 0.0162<br>[-0.0346,0.0670]    | 0.0694*<br>[0.0129,0.126]   |
| <b>DN(70%)+PF</b>     |                              |                               |                               |                             |
| Below tertiary        | -0.00792<br>[-0.0512,0.0354] | 0.00264<br>[-0.0412,0.0465]   | -0.0333<br>[-0.0840,0.0173]   | 0.0307<br>[-0.0254,0.0868]  |
| Above tertiary        | -0.0243<br>[-0.0666,0.0180]  | -0.0555*<br>[-0.0987,-0.0122] | -0.0372<br>[-0.0874,0.0130]   | 0.0428<br>[-0.0115,0.0970]  |
| <b>DN(70%)+RC(S)</b>  |                              |                               |                               |                             |
| Below tertiary        | 0.00694<br>[-0.0370,0.0509]  | -0.000504<br>[-0.0447,0.0437] | -0.00328<br>[-0.0531,0.0465]  | 0.00893<br>[-0.0479,0.0657] |
| Above tertiary        | -0.0113<br>[-0.0543,0.0317]  | -0.0660**<br>[-0.111,-0.0205] | -0.0113<br>[-0.0623,0.0397]   | 0.0776**<br>[0.0230,0.132]  |
| <b>DN(70%)+RC(SE)</b> |                              |                               |                               |                             |
| Below tertiary        | -0.0162<br>[-0.0596,0.0271]  | -0.00923<br>[-0.0548,0.0364]  | -0.0552*<br>[-0.106,-0.00451] | -0.0343<br>[-0.0904,0.0217] |
| Above tertiary        | -0.0193<br>[-0.0633,0.0247]  | -0.0253<br>[-0.0691,0.0185]   | -0.00203<br>[-0.0534,0.0494]  | 0.0497<br>[-0.00570,0.105]  |
| <i>N</i>              | 5784                         | 5784                          | 5784                          | 5784                        |
